# Supplementary material
Source: PubMed Central journal article supplement (PMC31894)

Isoelectric point (pH)

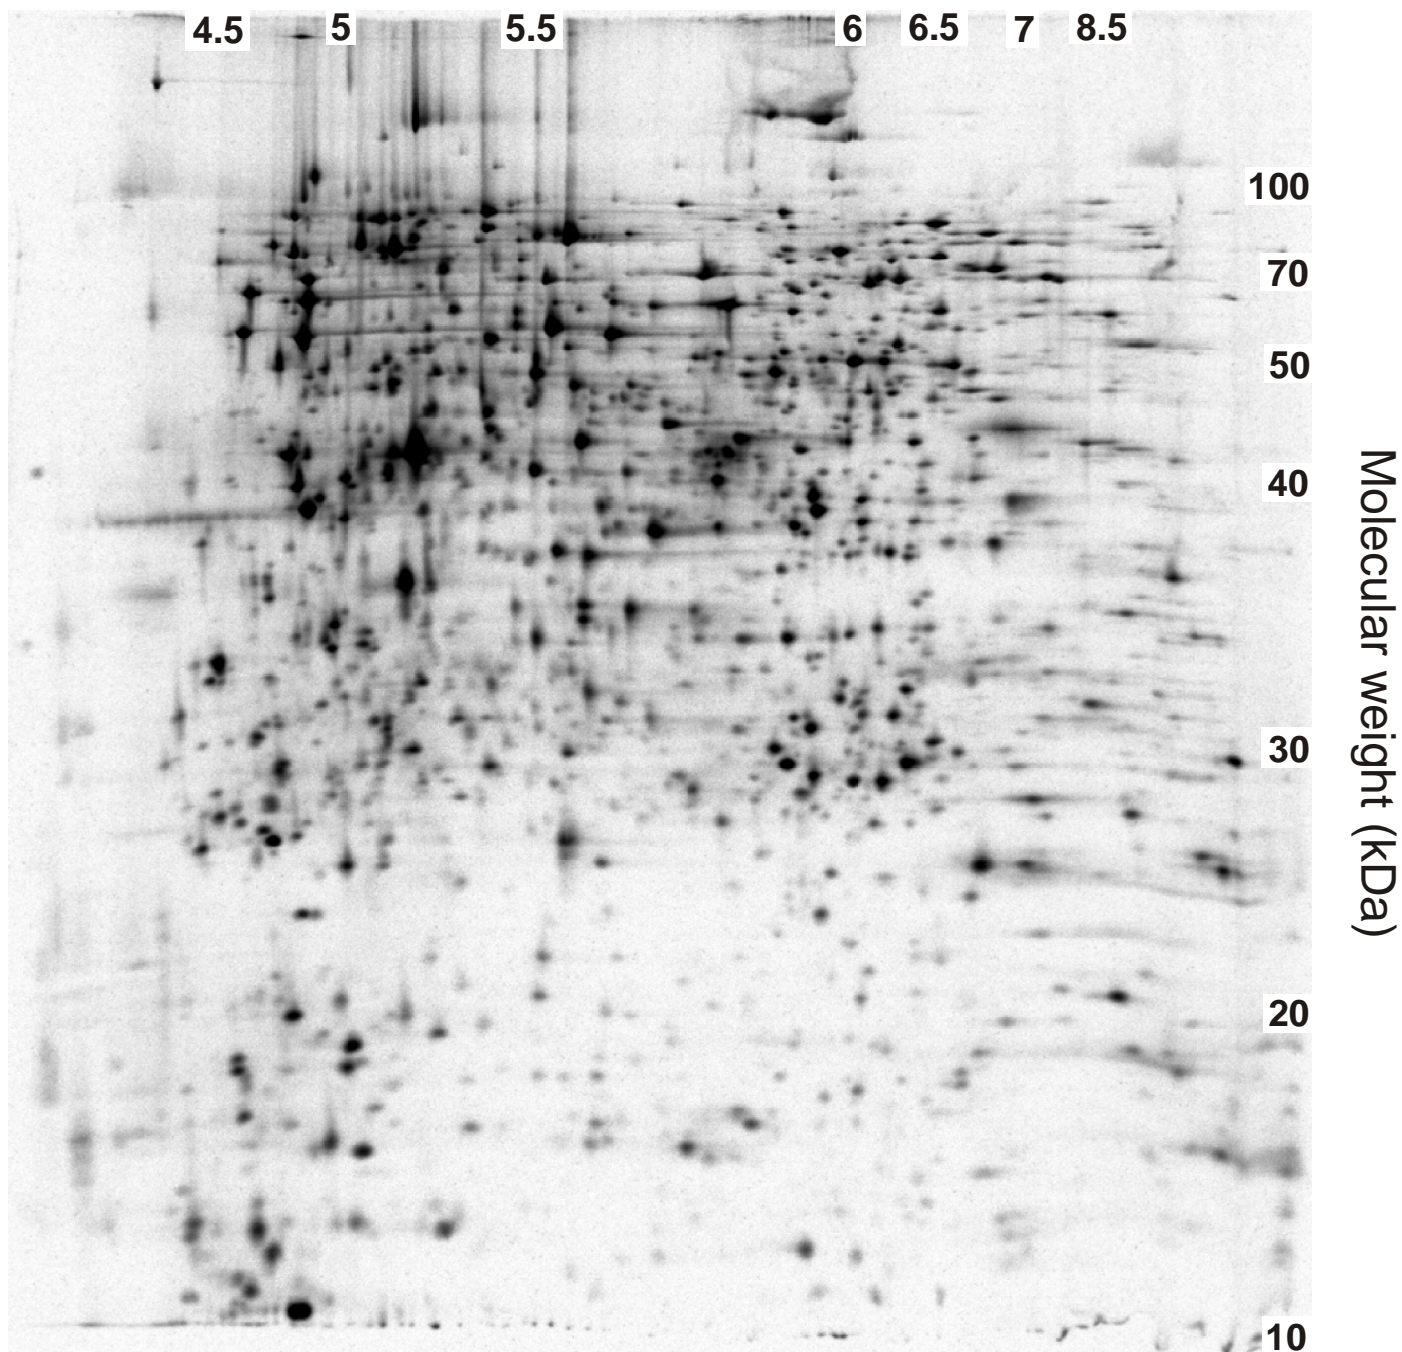

# Spots of cell cycle expression clusters 1, 2, 3, 4

Isoelectric point (pH)

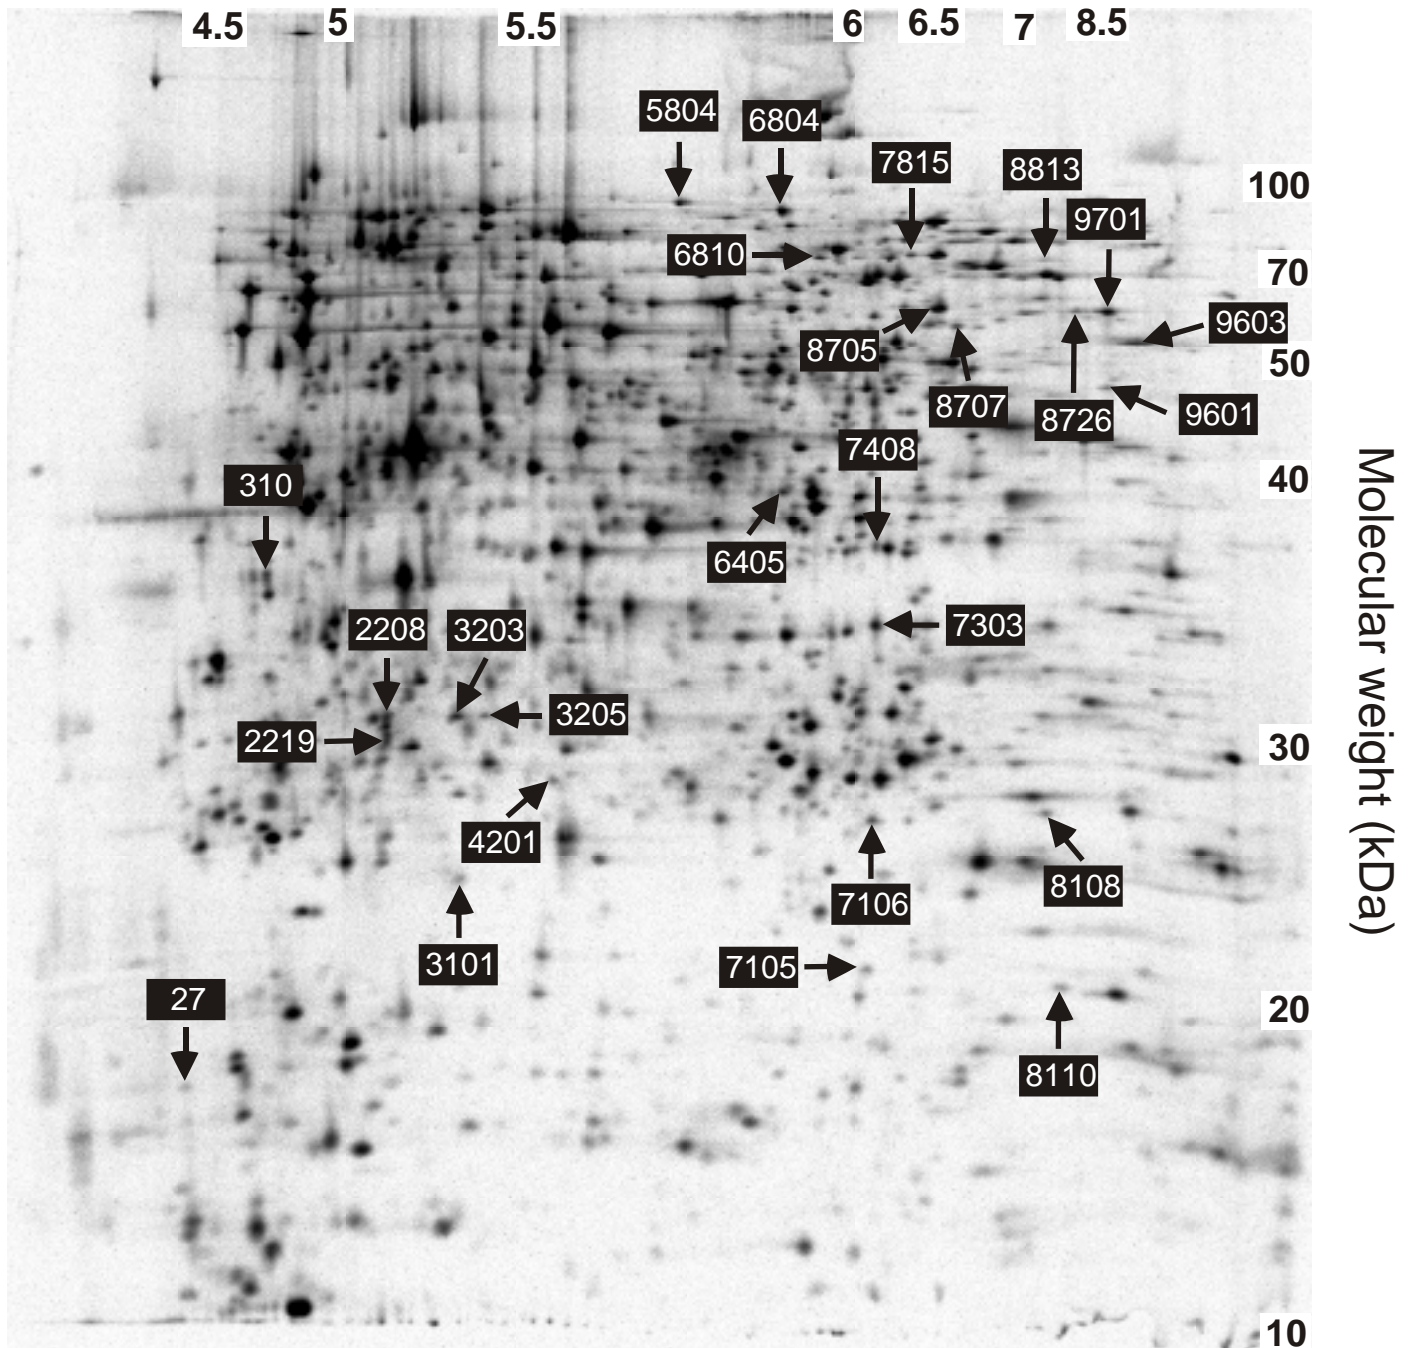

Spots of cell cycle expression clusters 5, 6, 7, 8, 9, 10

Isoelectric point (pH)

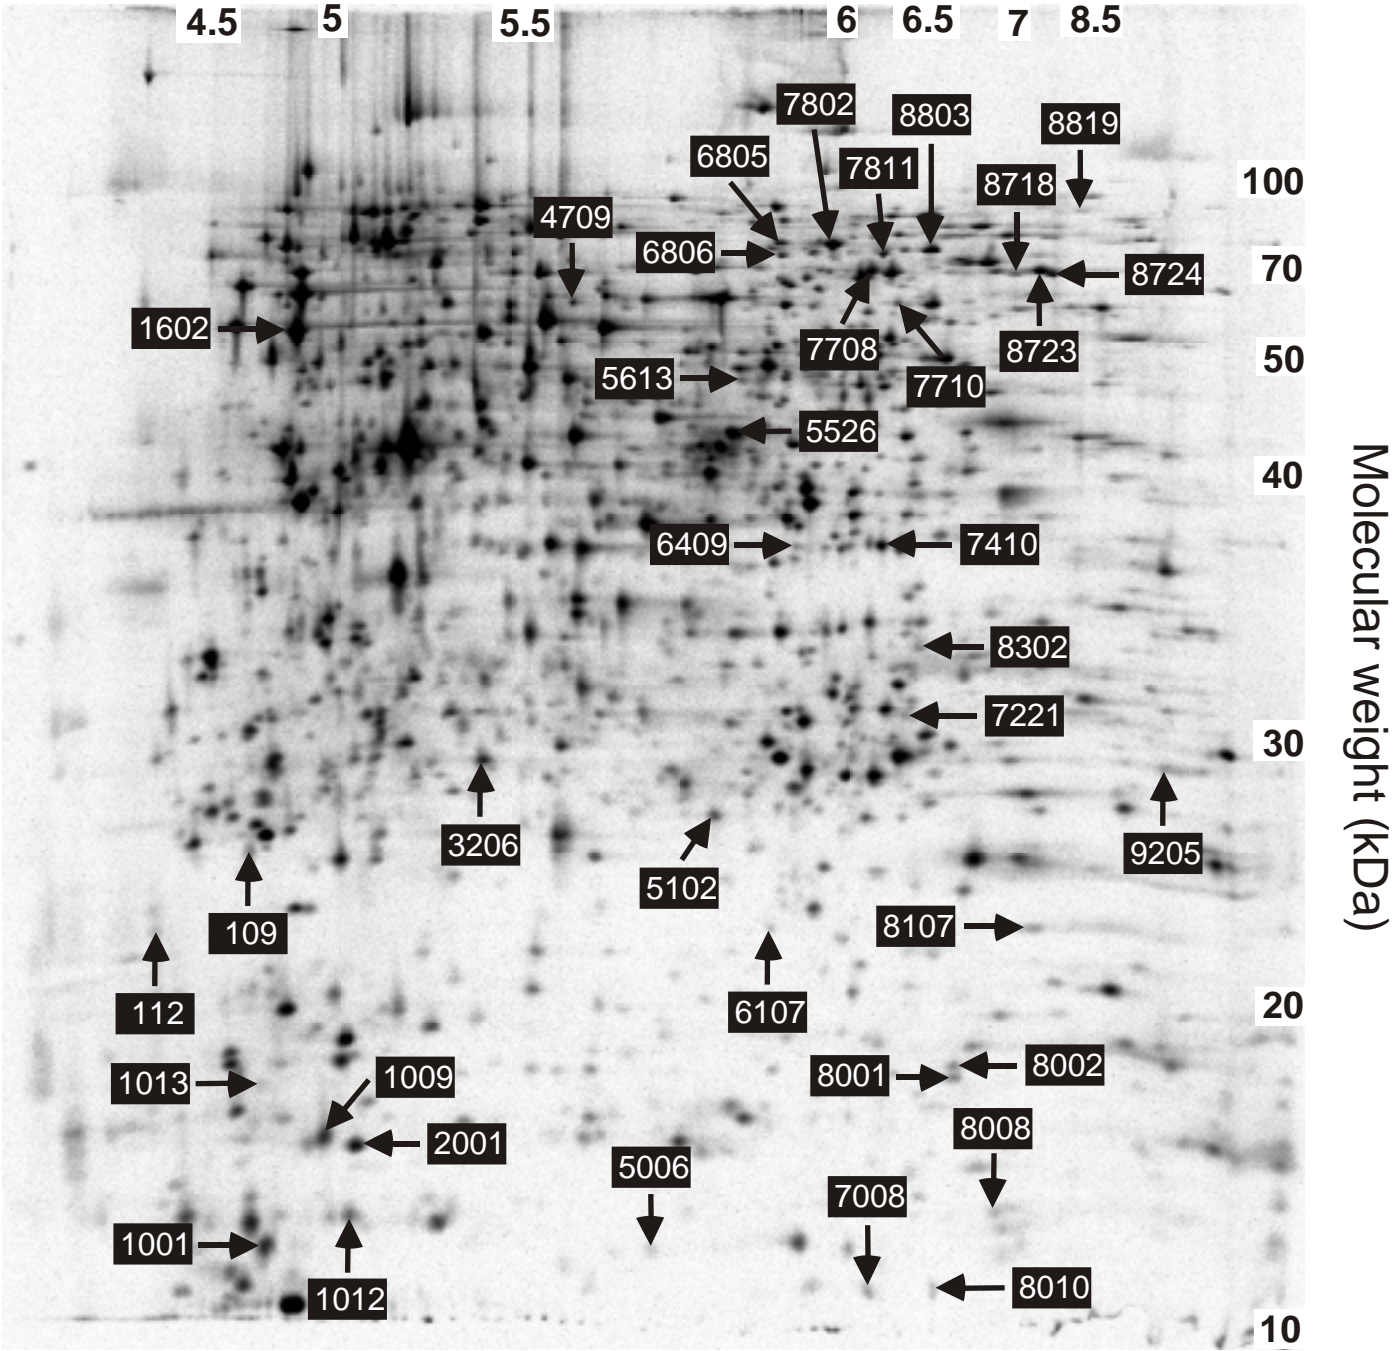

# Spots of cell cycle expression clusters 11, 12, 13, 14, 15

Isoelectric point (pH)

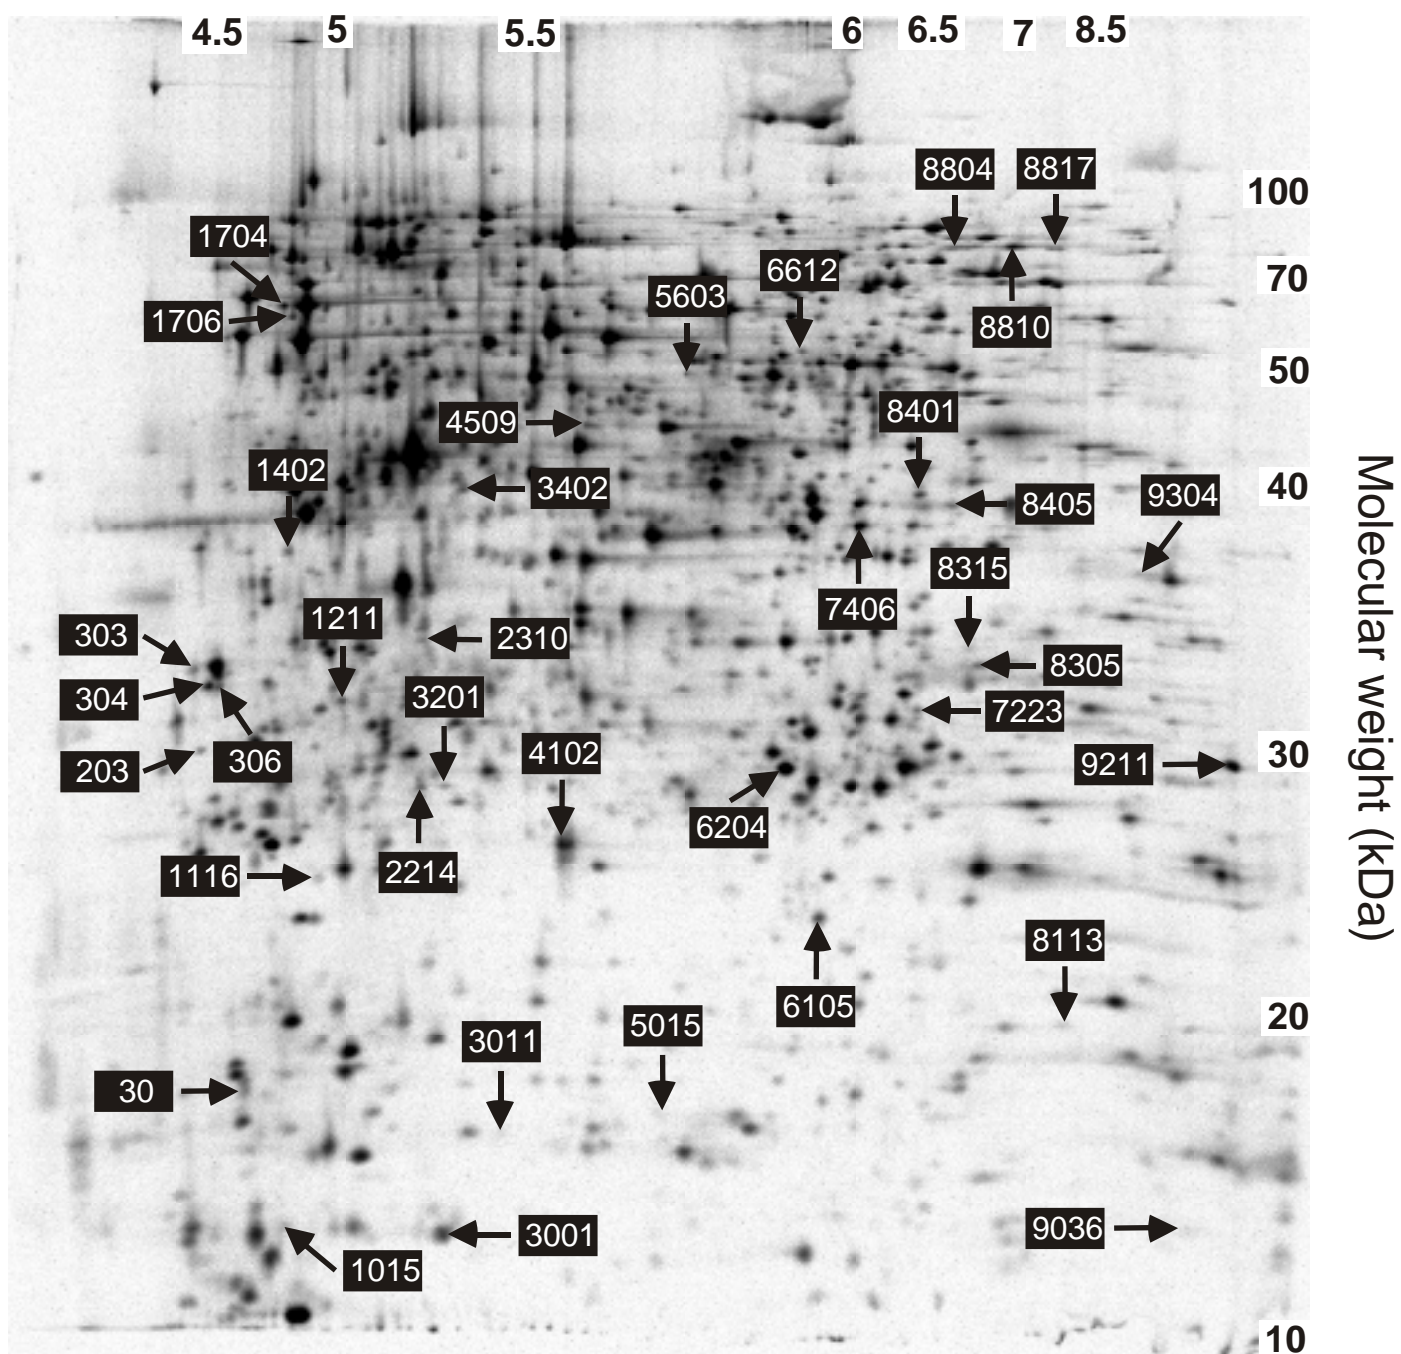

Spots of cell cycle expression clusters  
16, 17, 18, 19, 20, 21, 22, 23

Isoelectric point (pH)

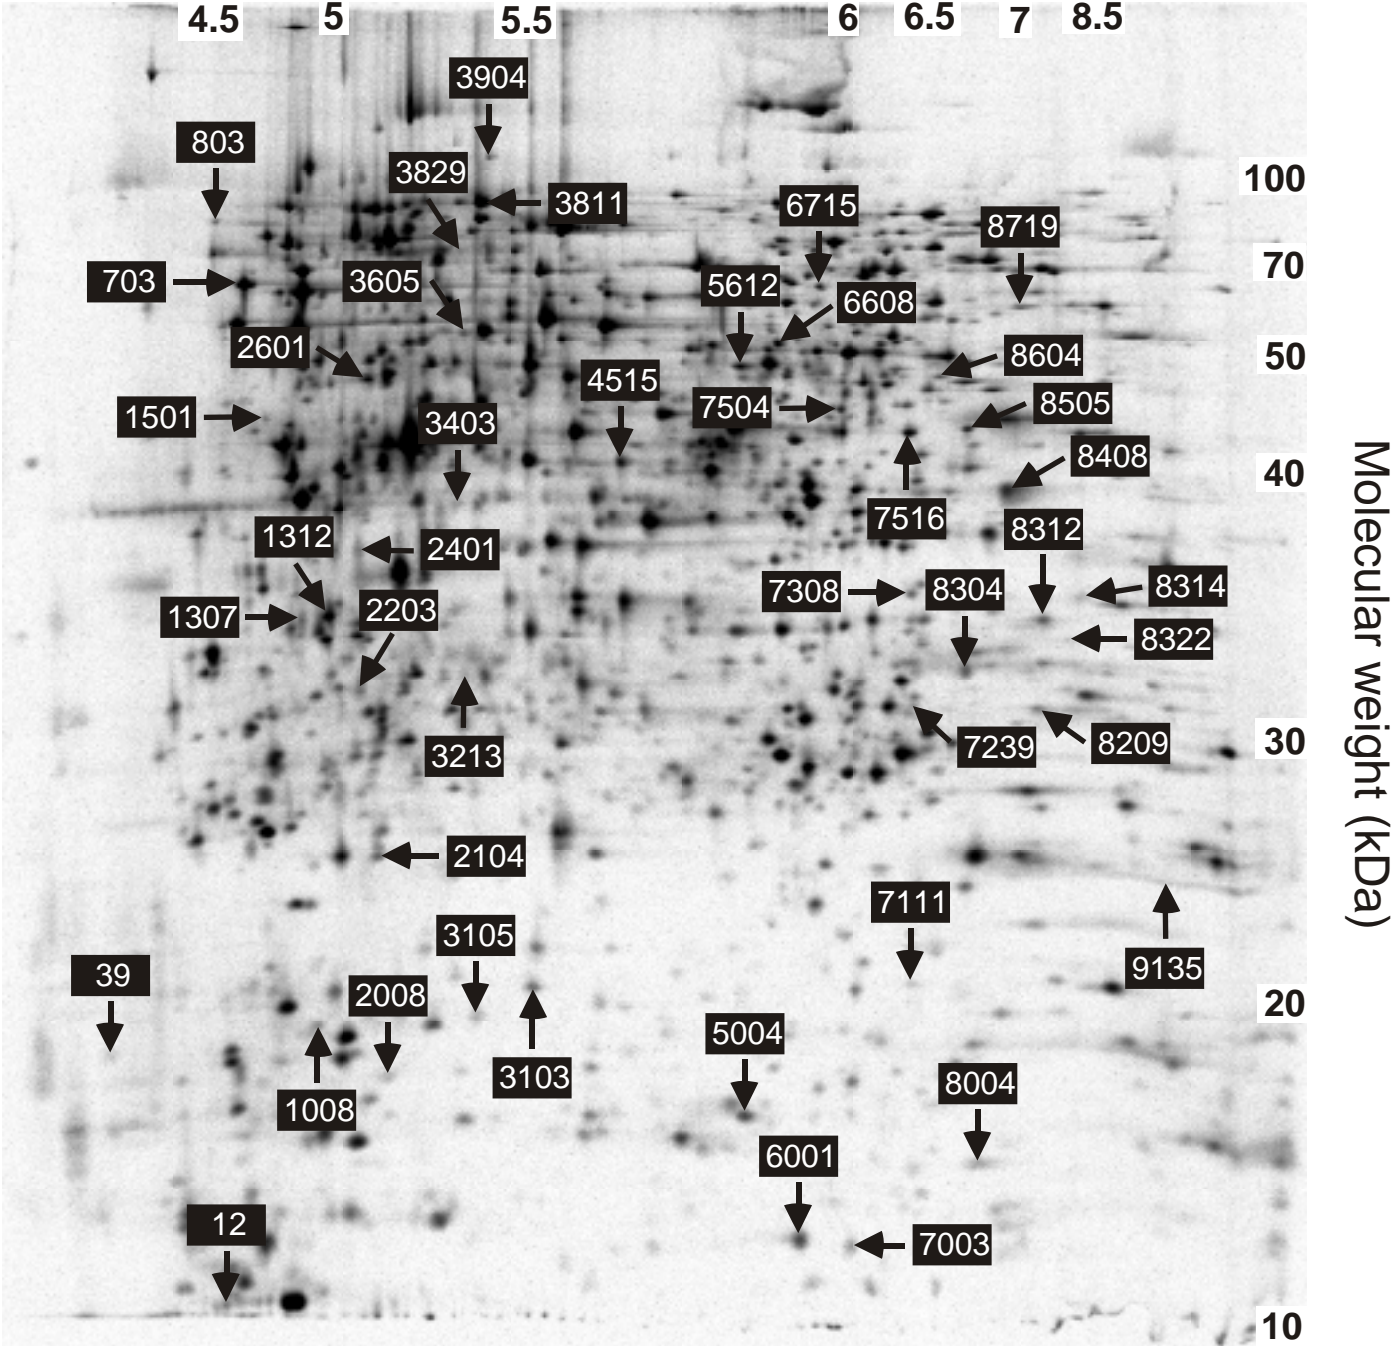

# Spots induced by synchronization procedure (1)

Isoelectric point (pH)

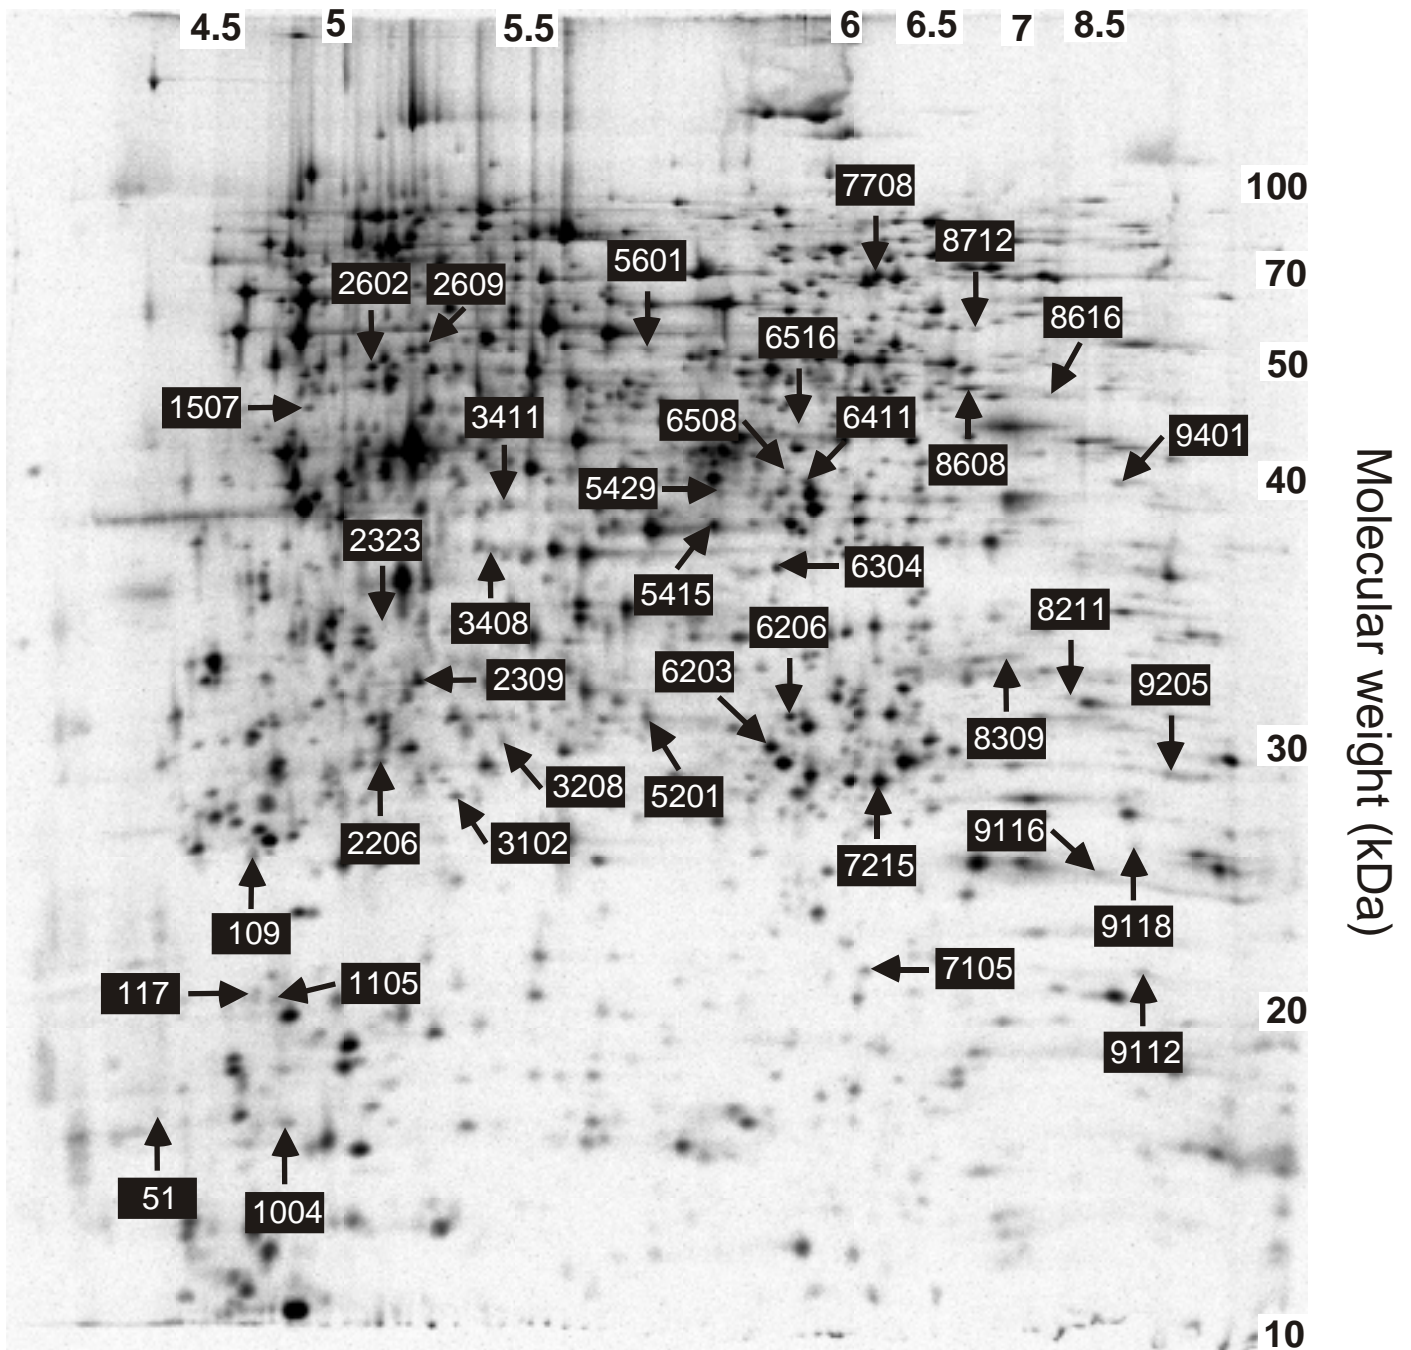

Spots induced by synchronization procedure (2)

Isoelectric point (pH)

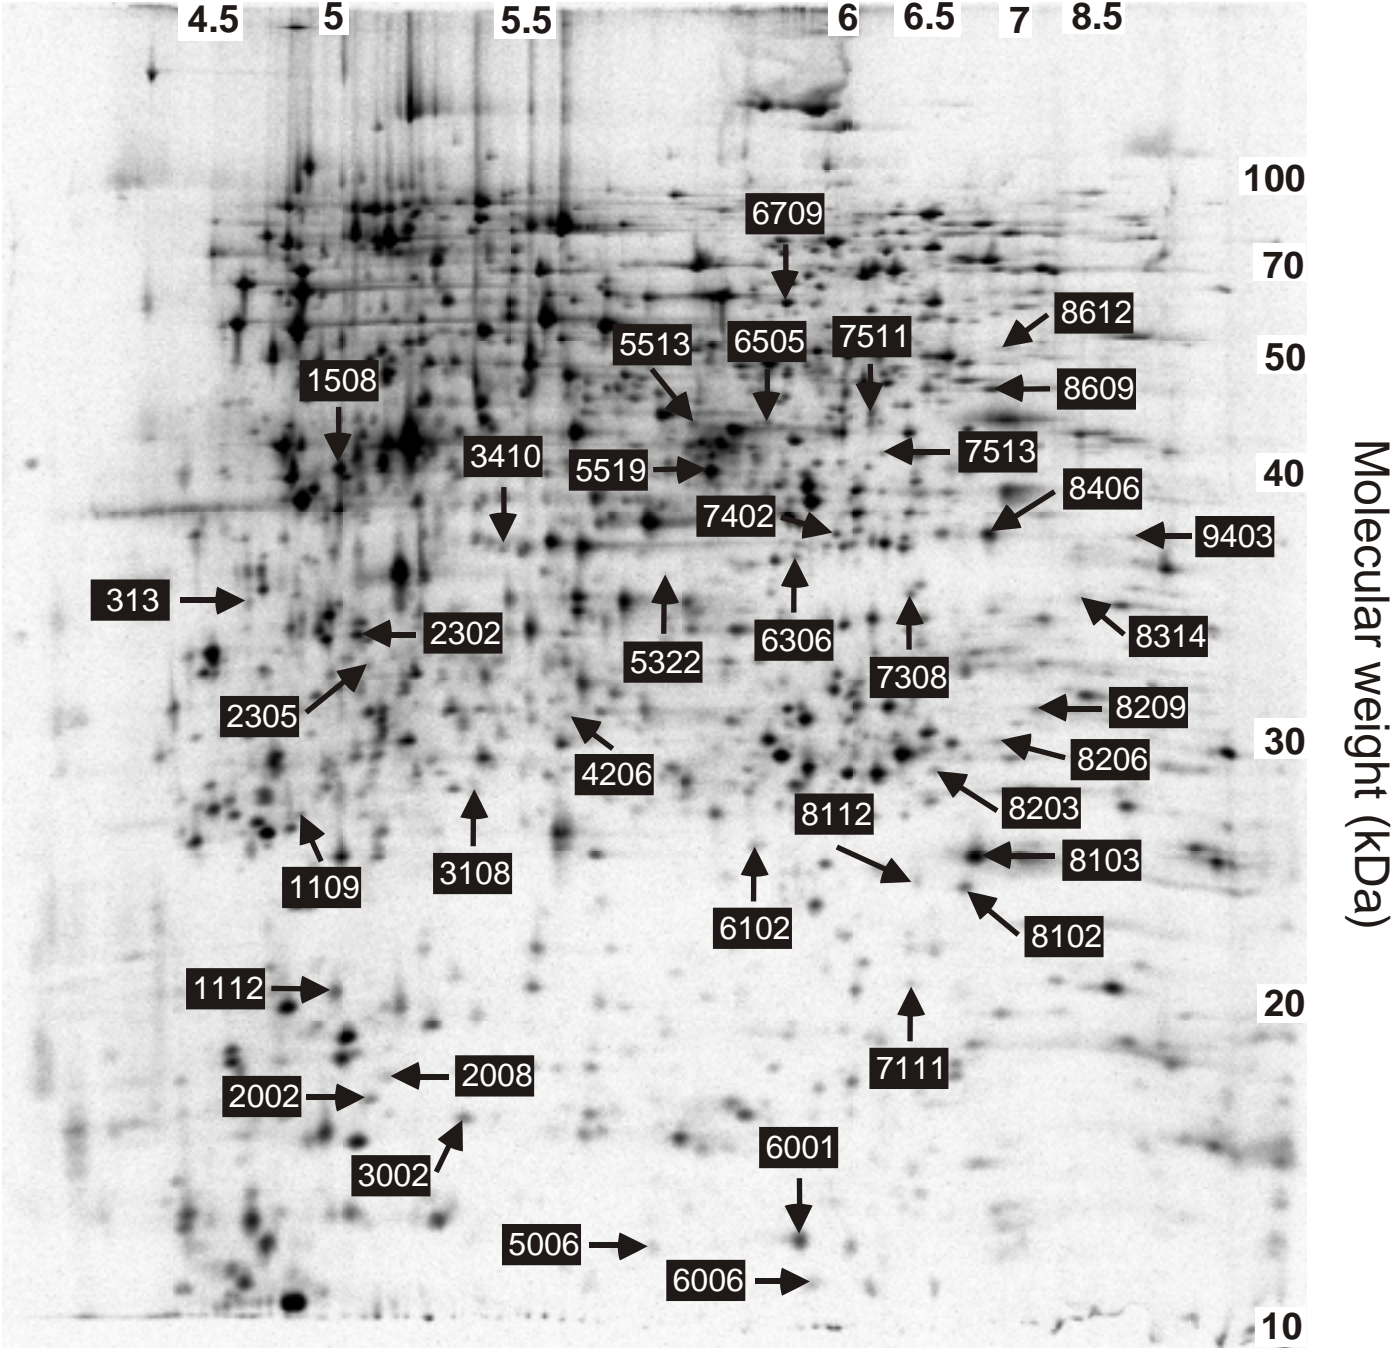

# Spots repressed by synchronization procedure (1)

Isoelectric point (pH)

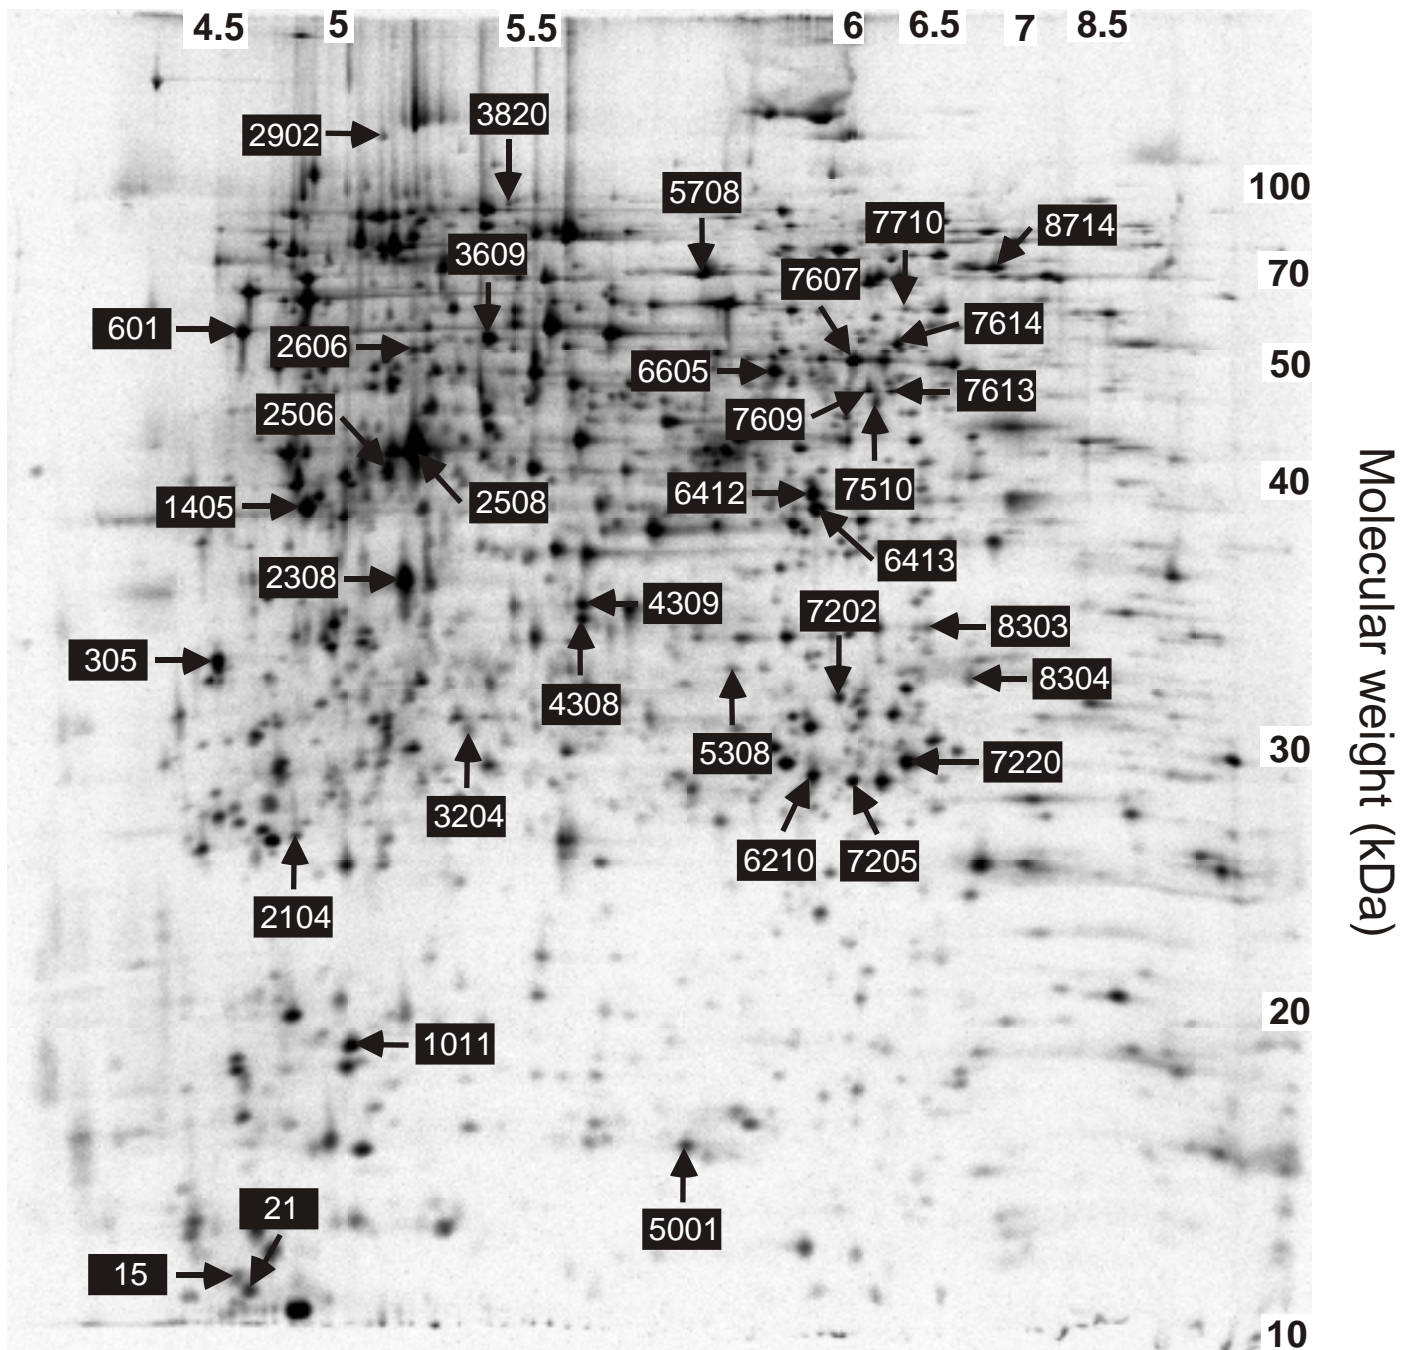



## Spots repressed by synchronization procedure (2)

Isoelectric point (pH)

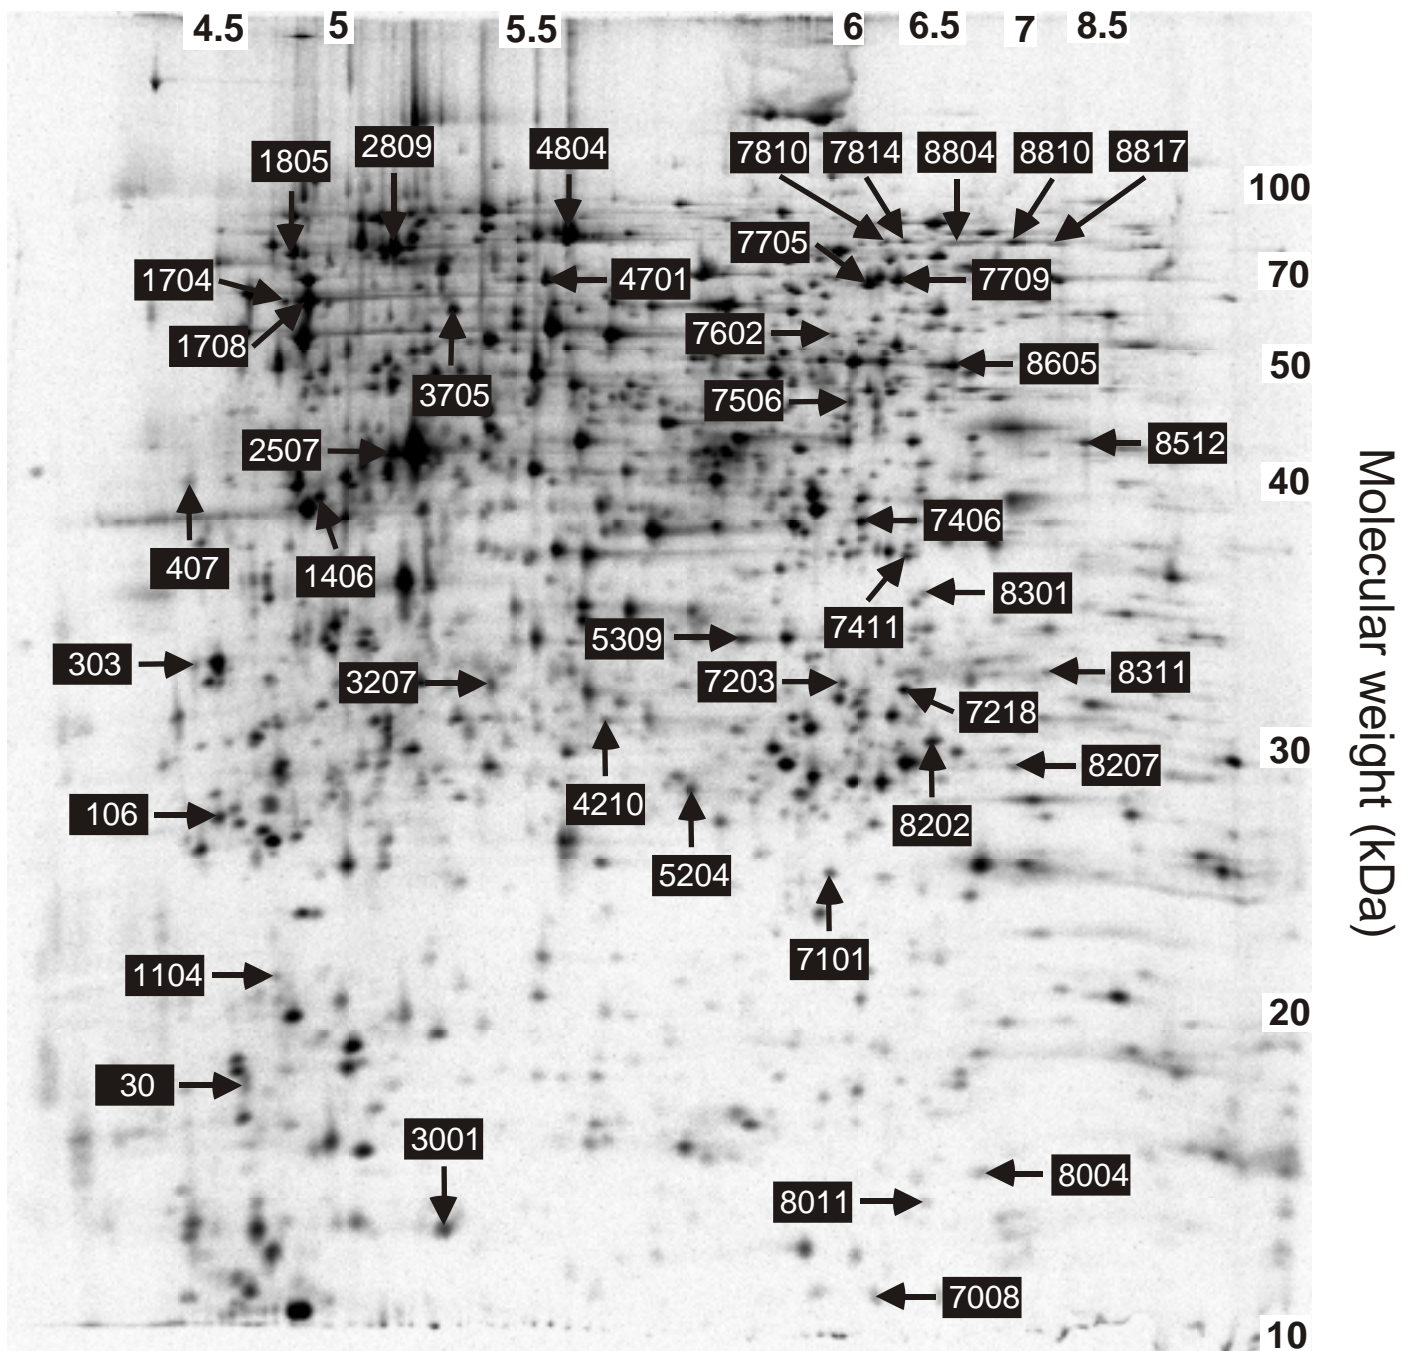

# Spots decreasing during pulse-chase

Isoelectric point (pH)

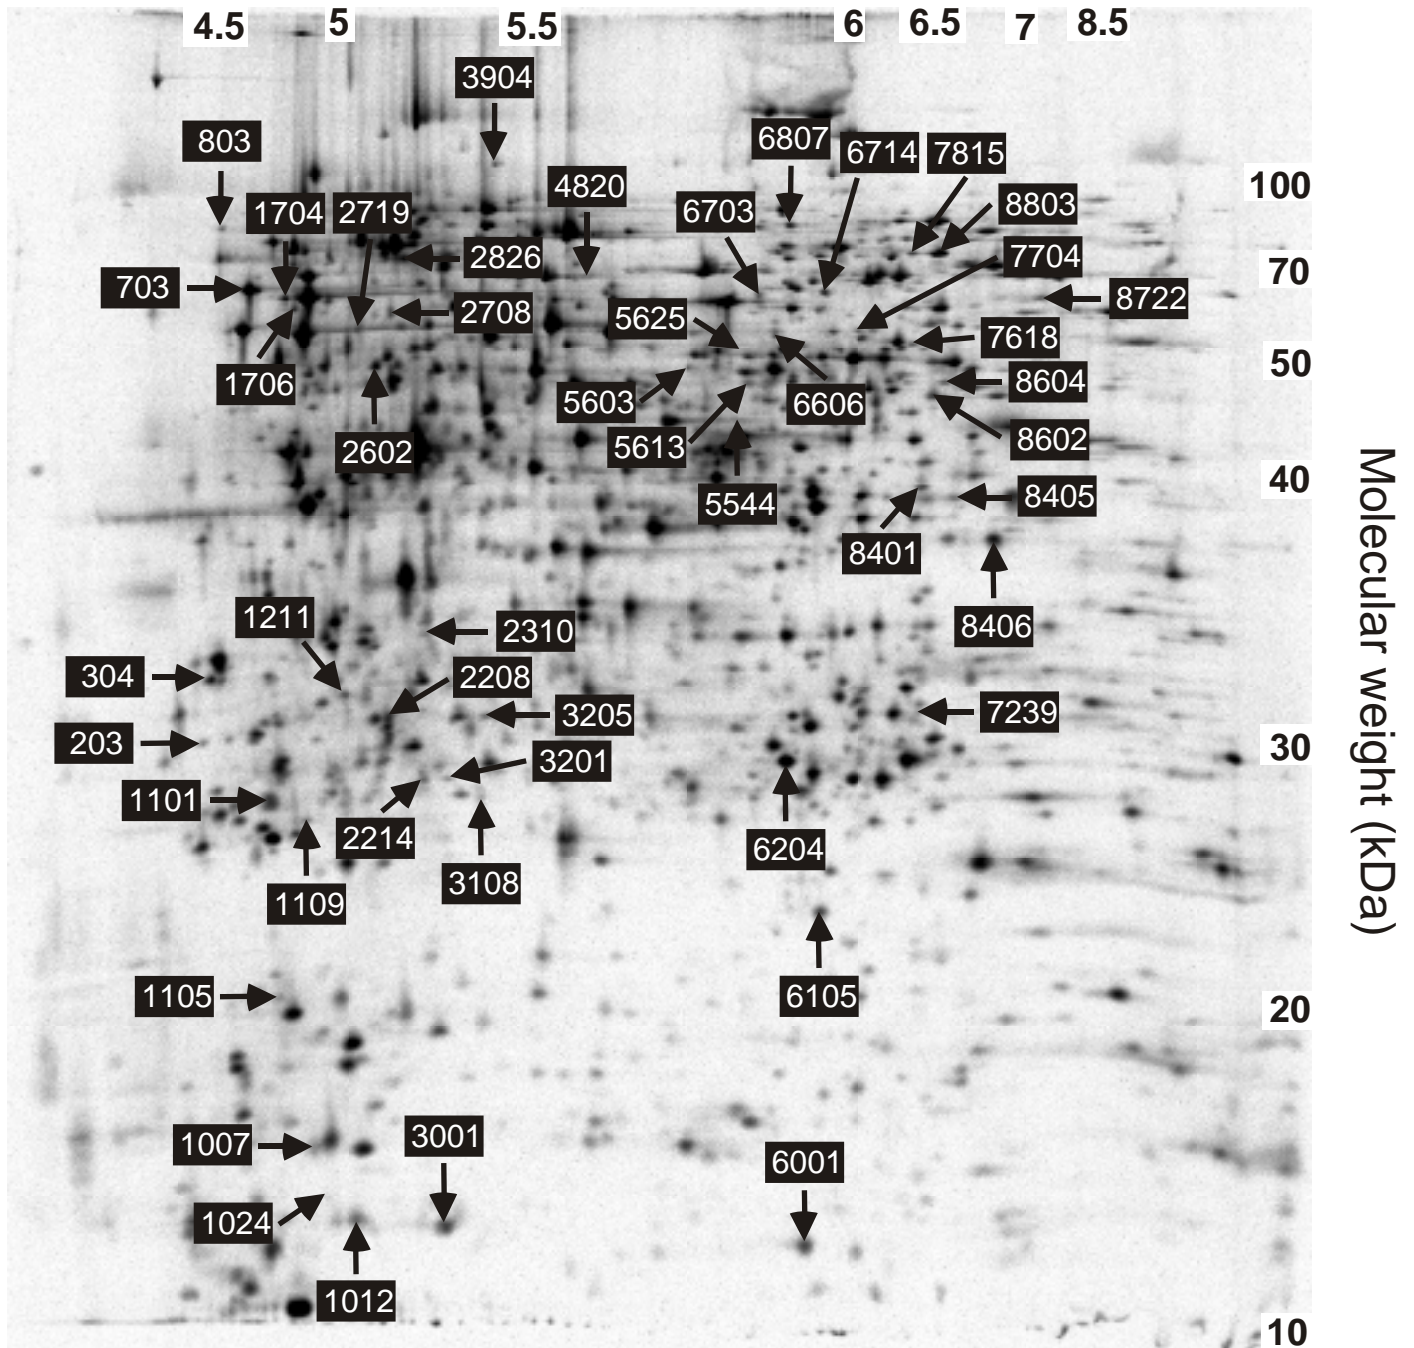

# Spots increasing during pulse-chase

Isoelectric point (pH)

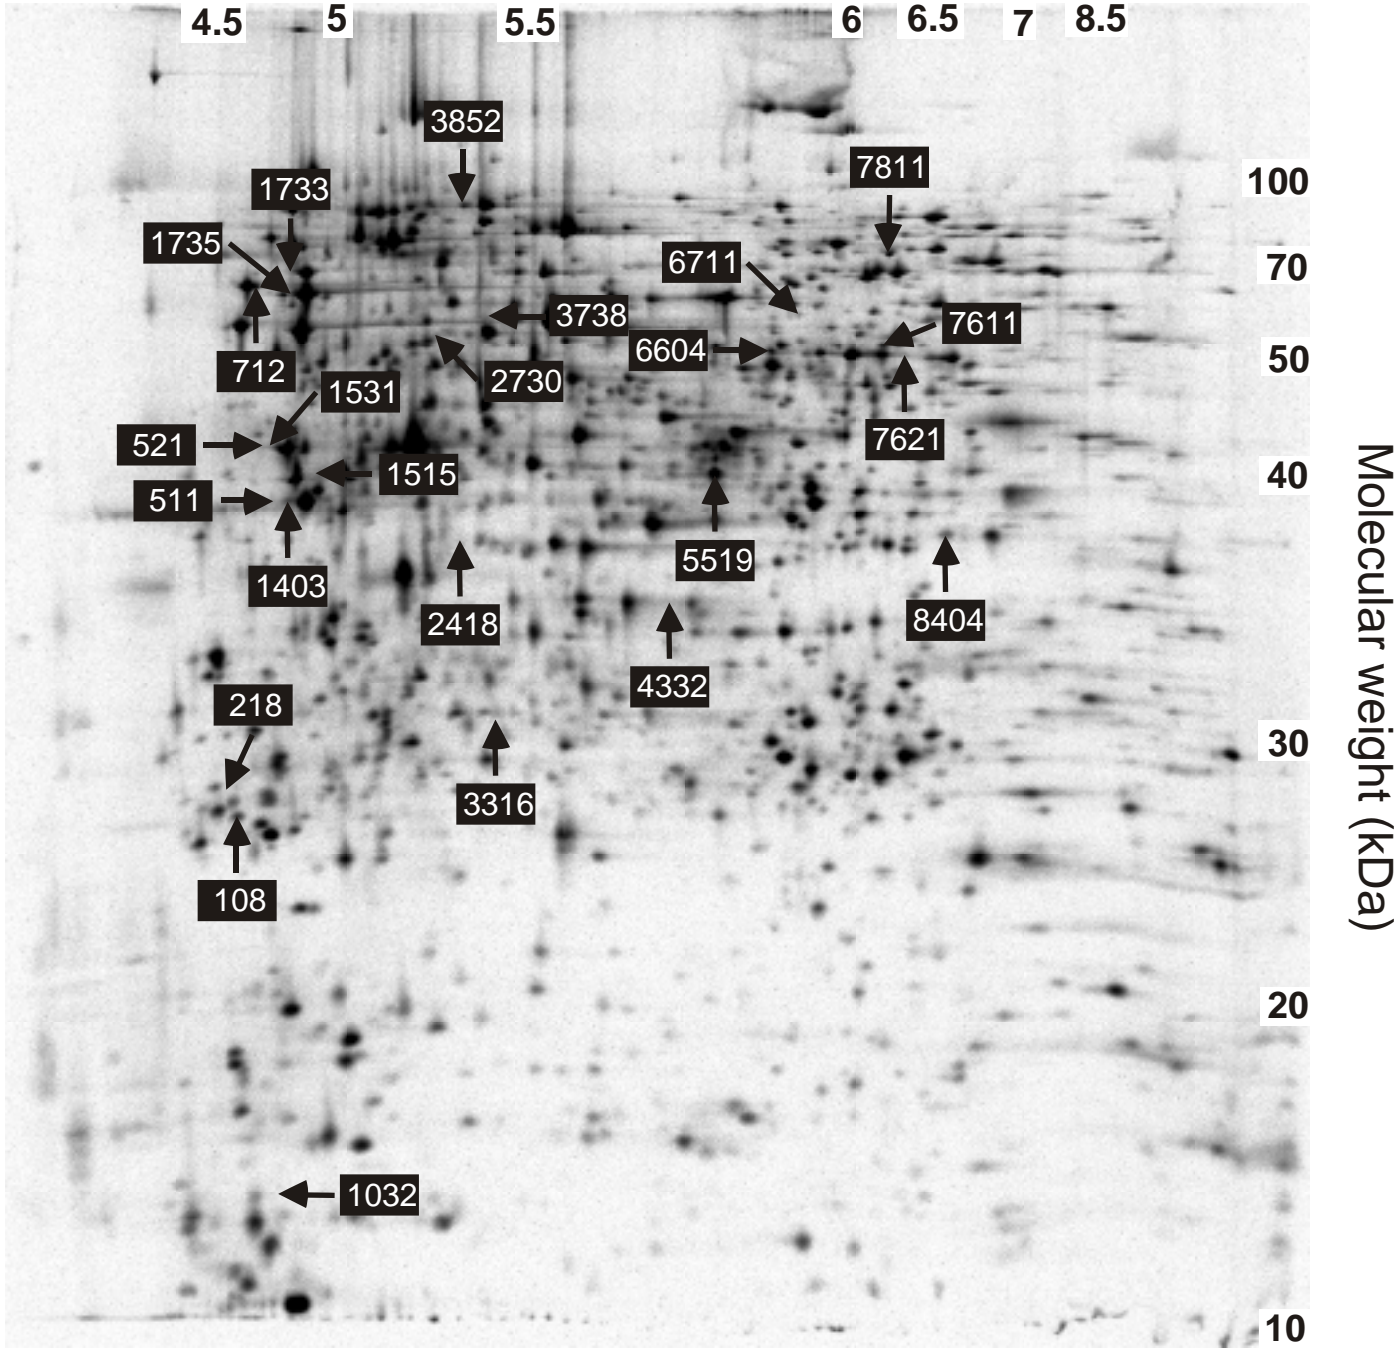

Supplement: pnas_071538098_5.pdf [file pnas_071538098_5.pdf]
