# Supplementary material
Source: PubMed Central journal article supplement (PMC31894)

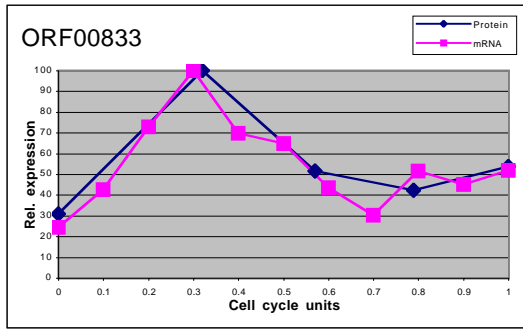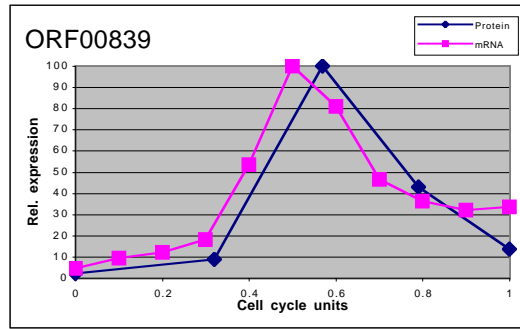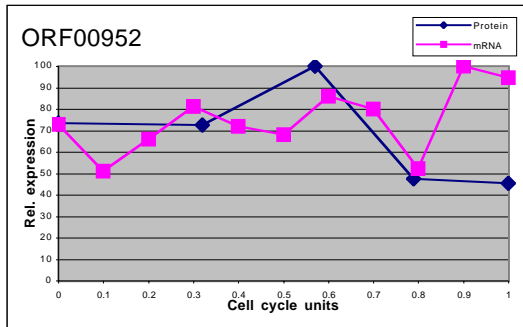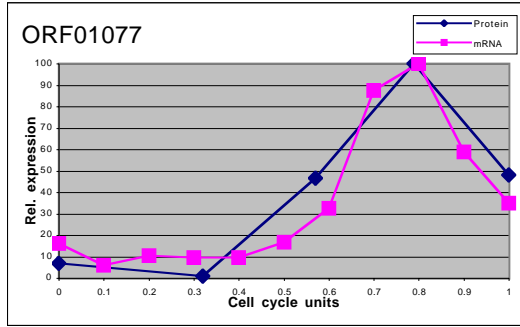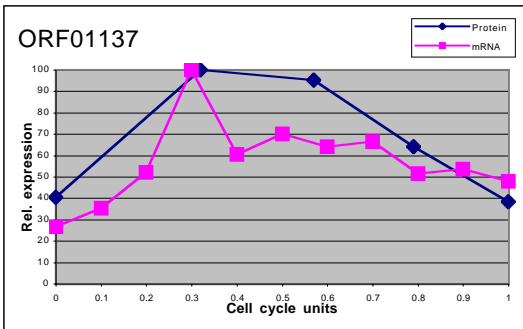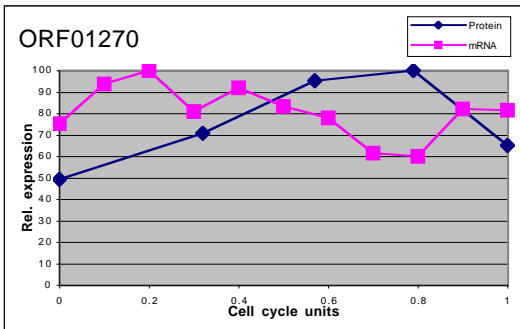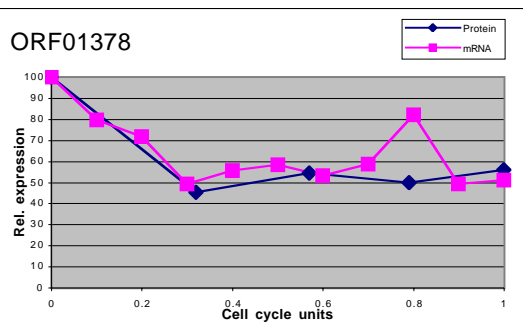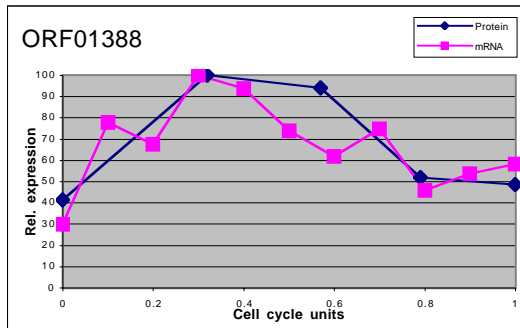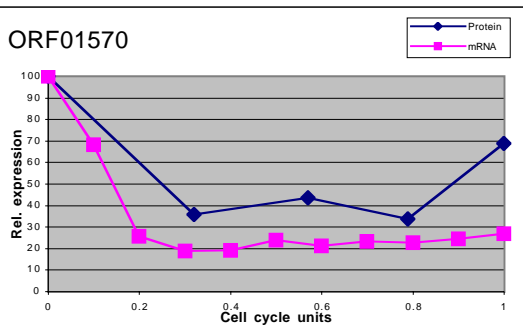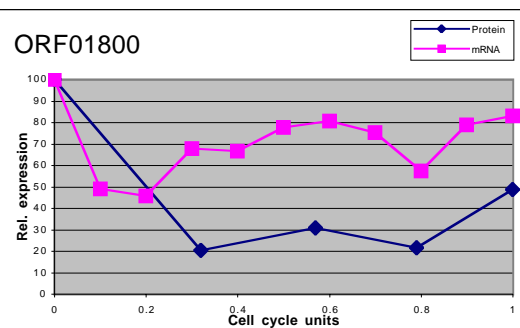

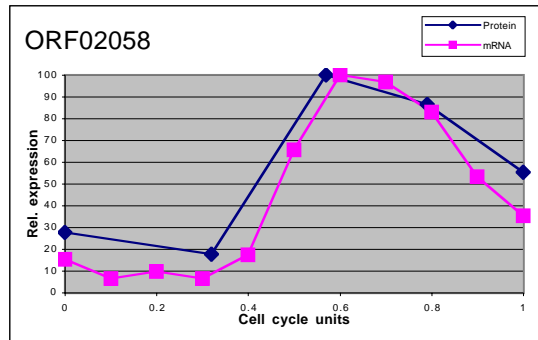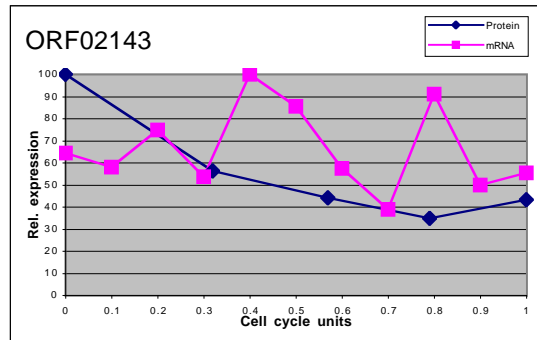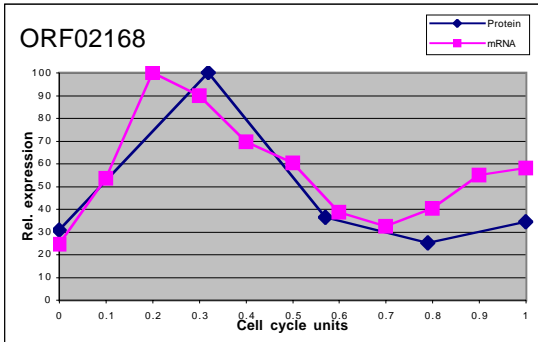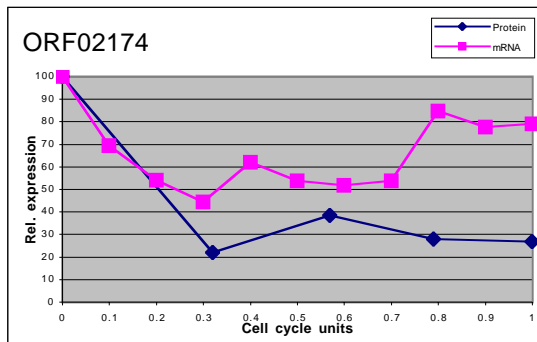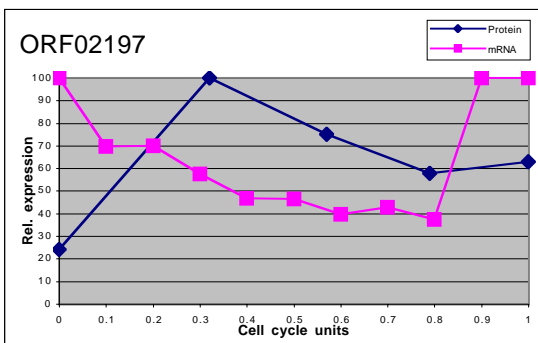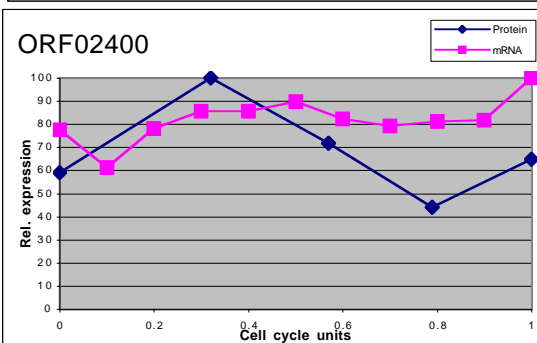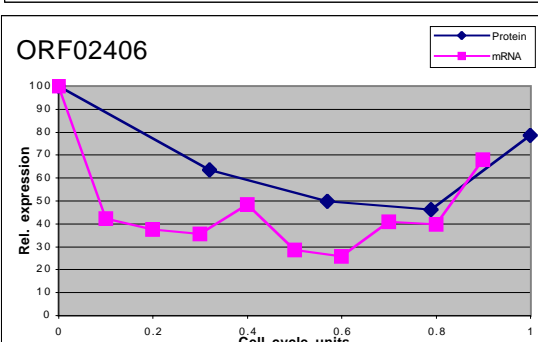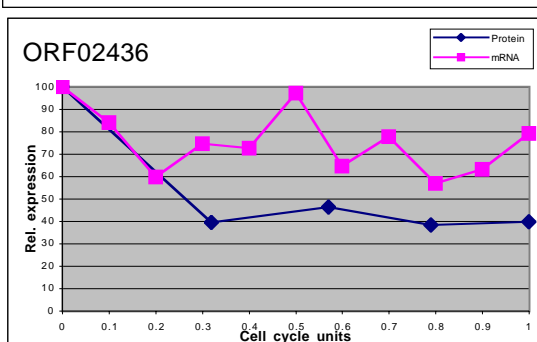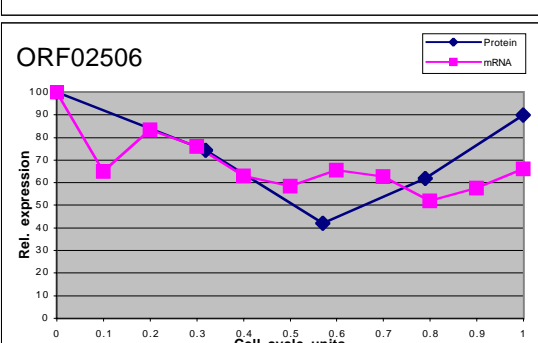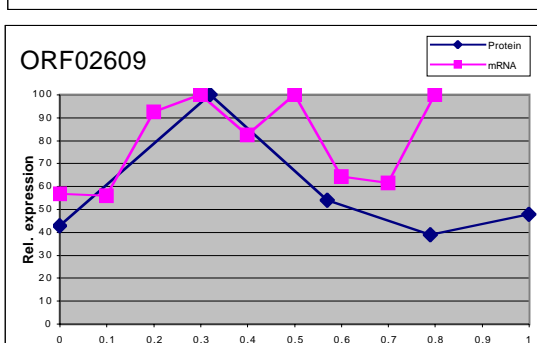

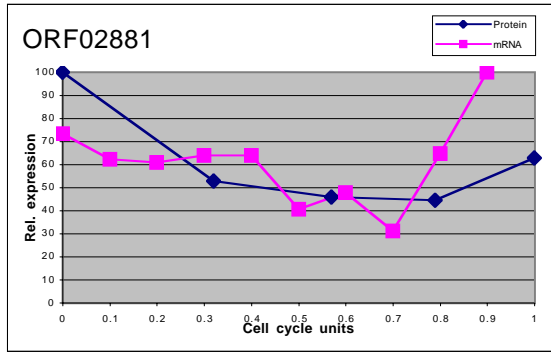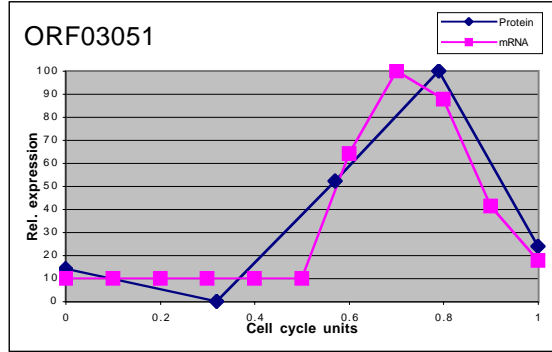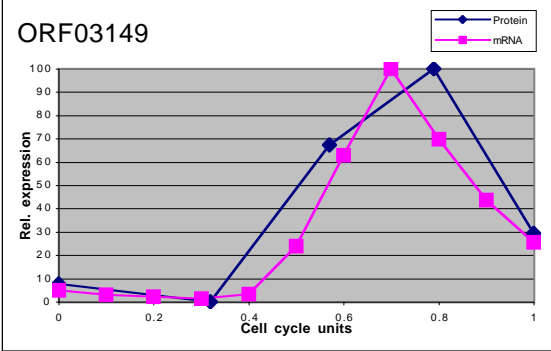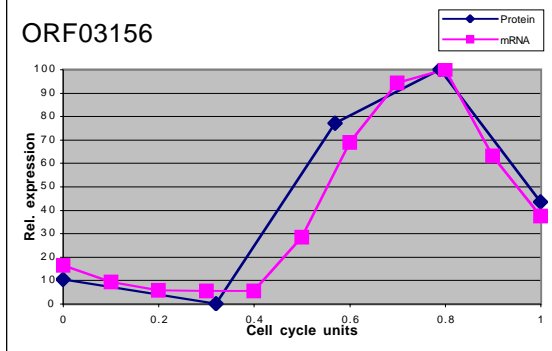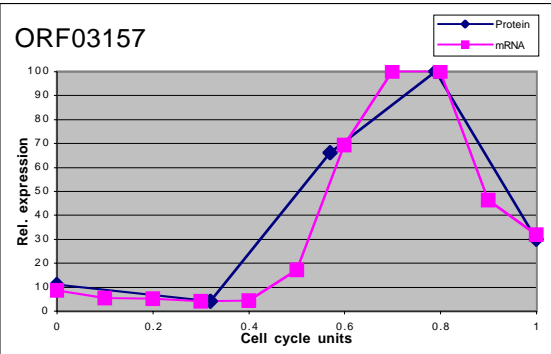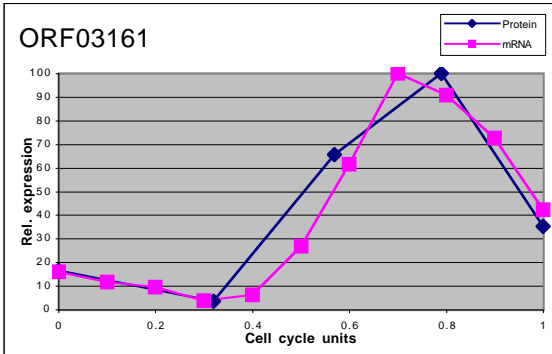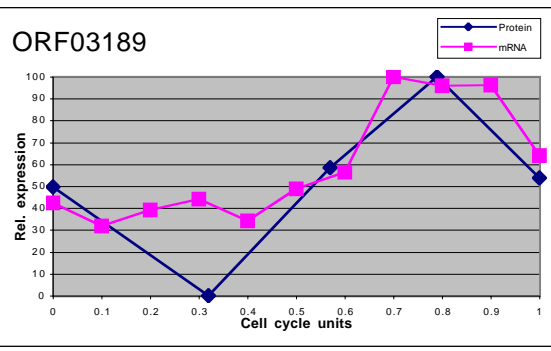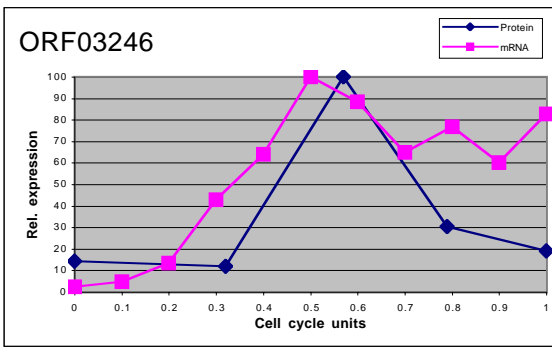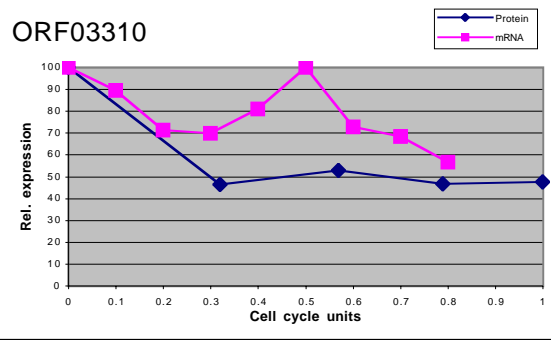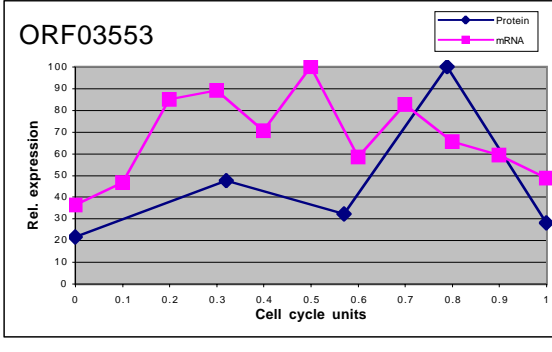

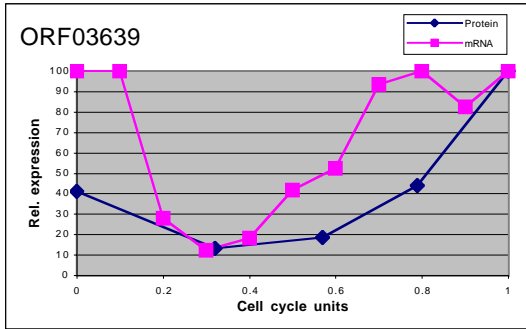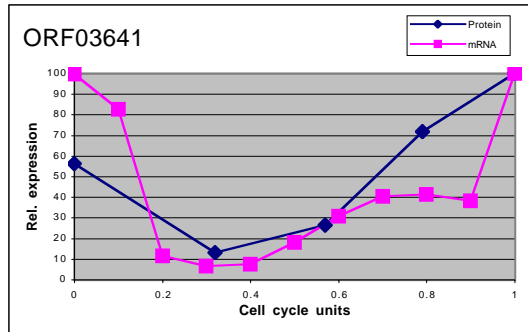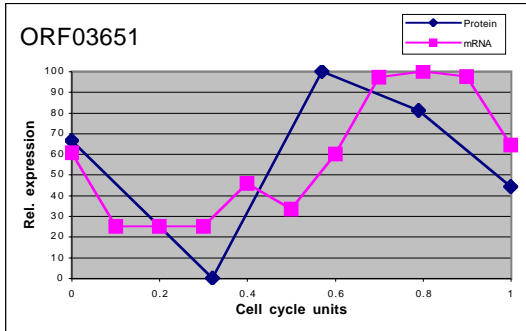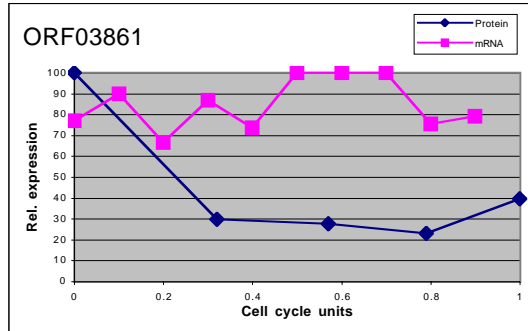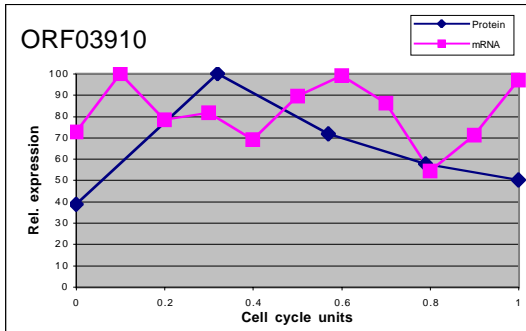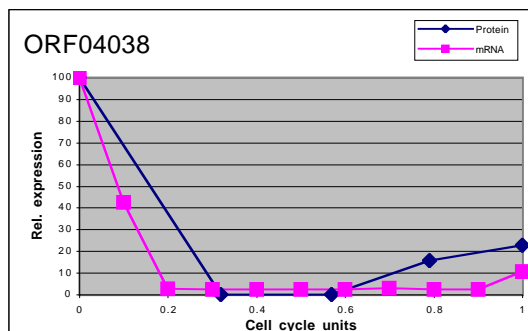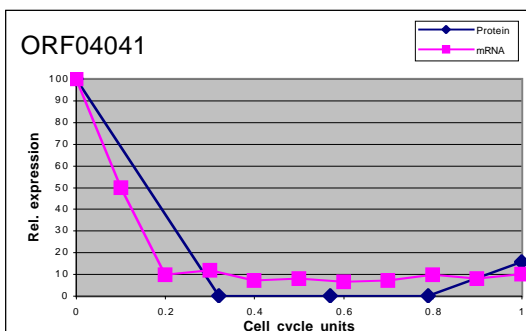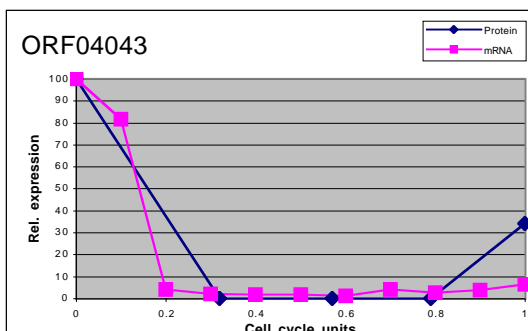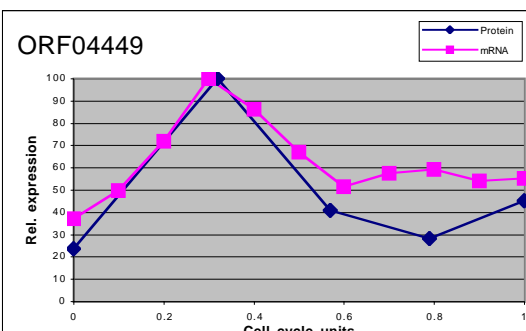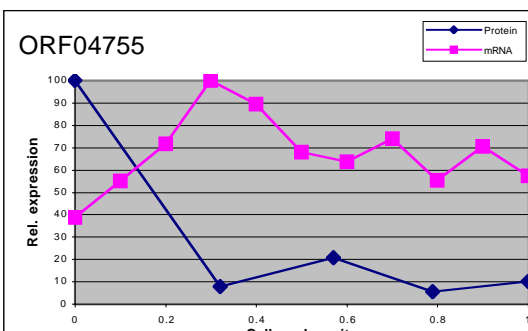

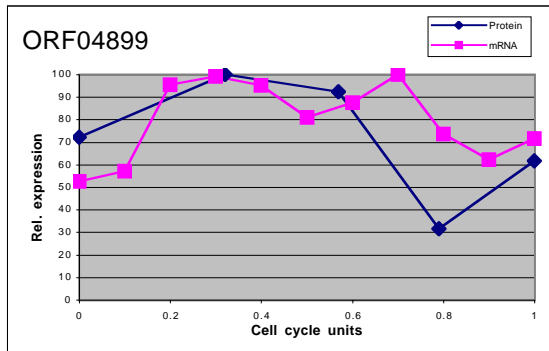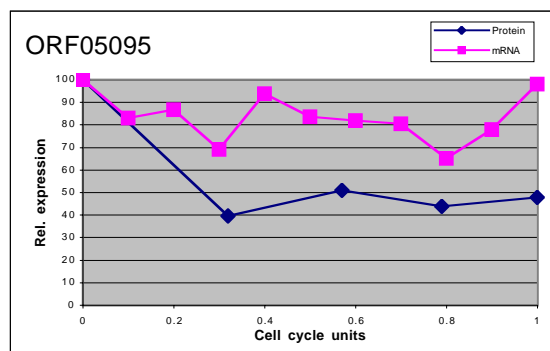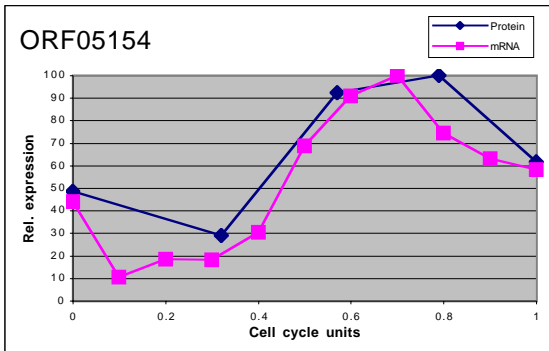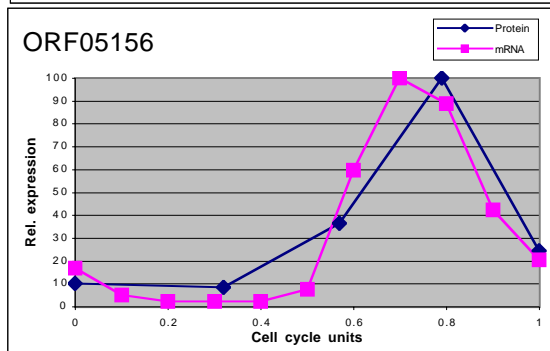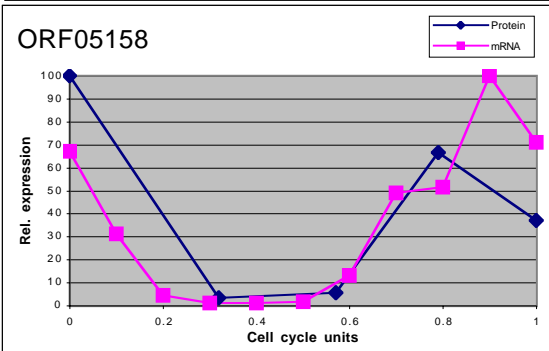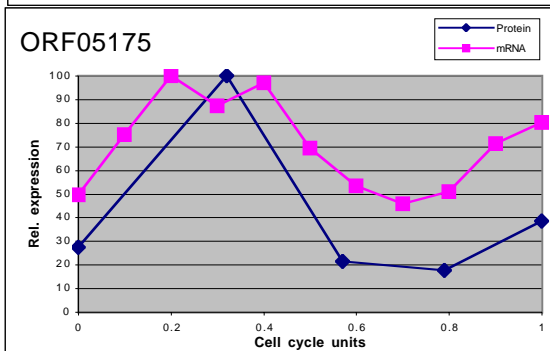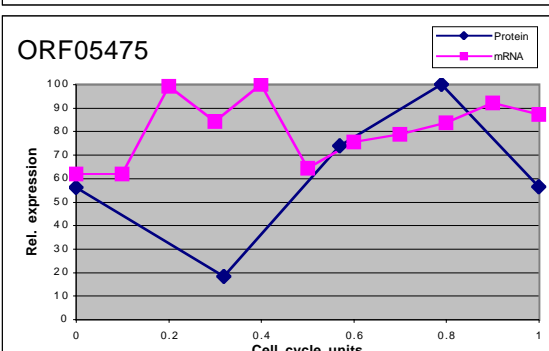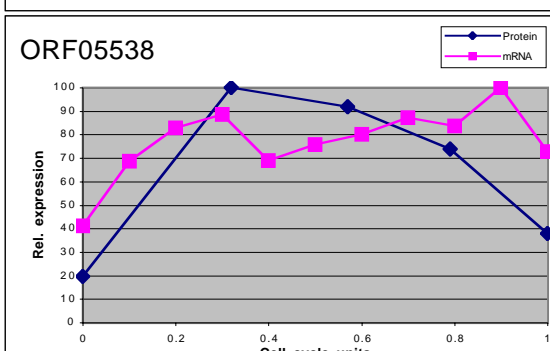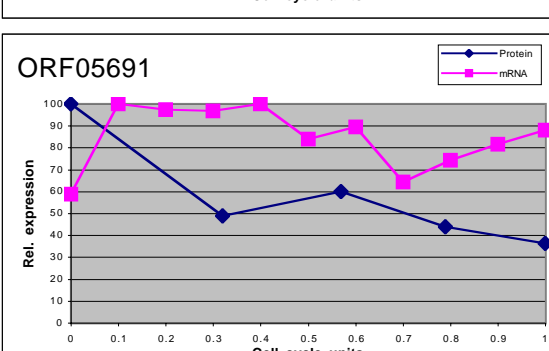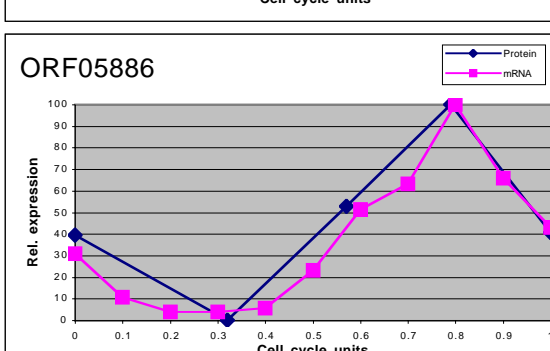

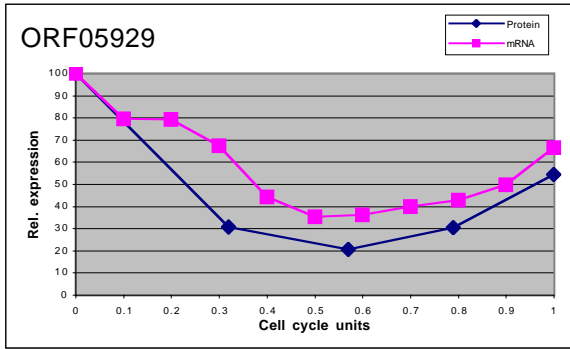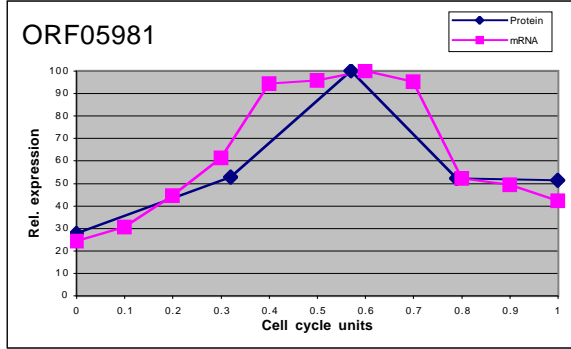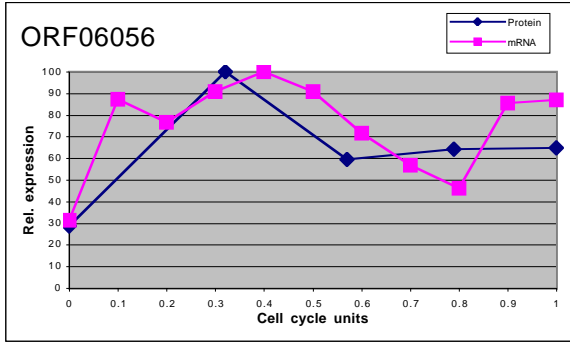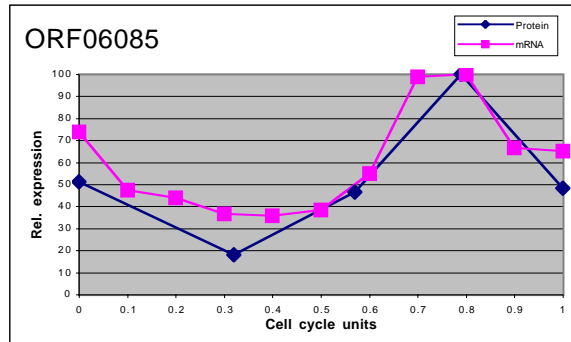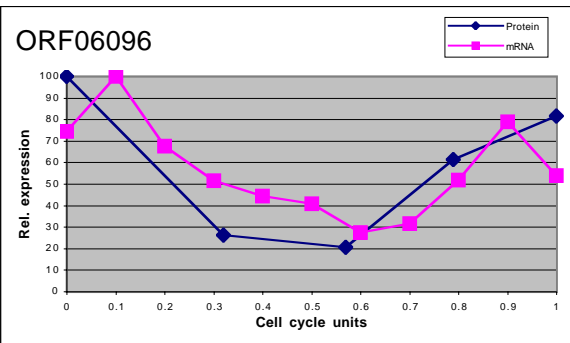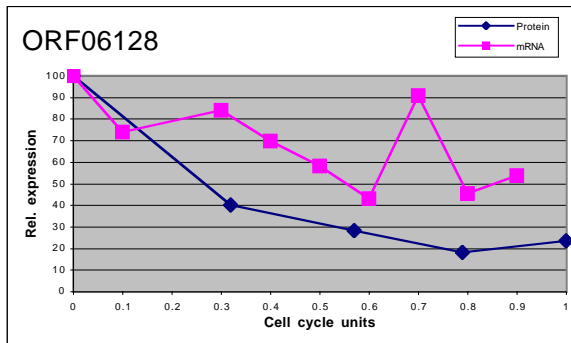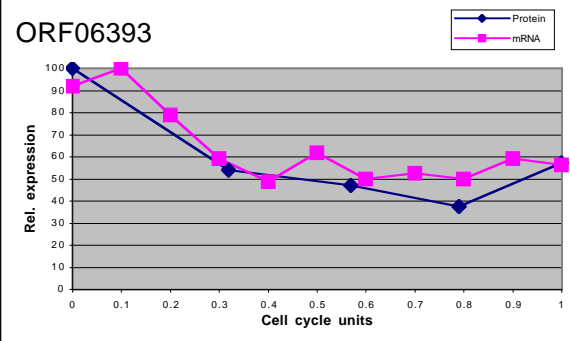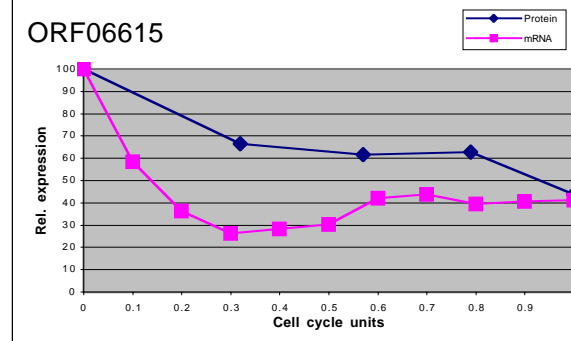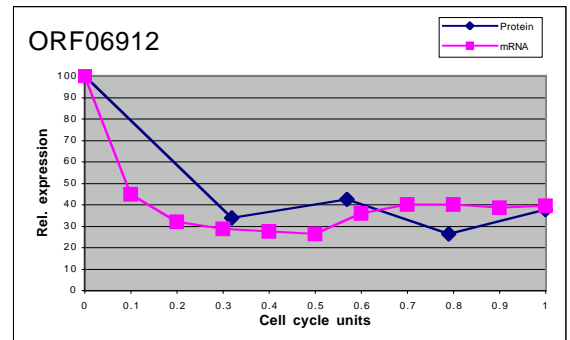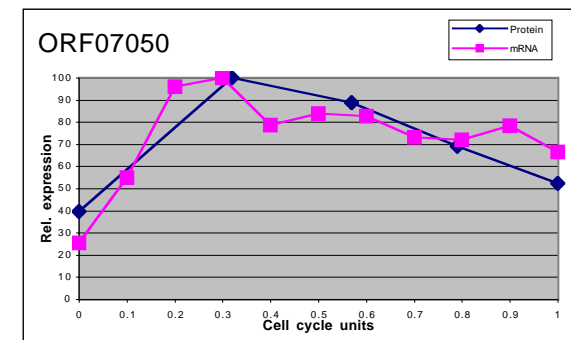

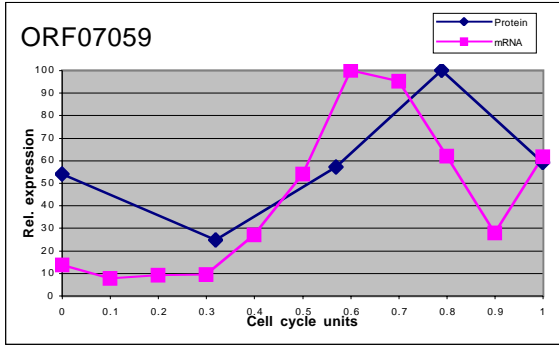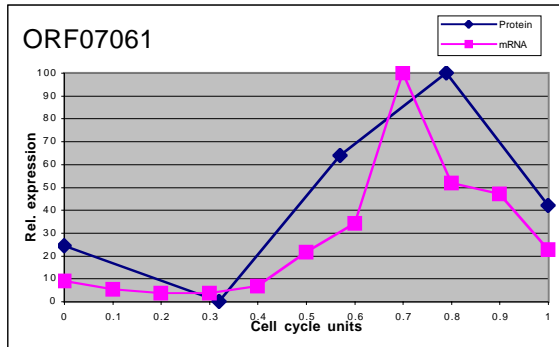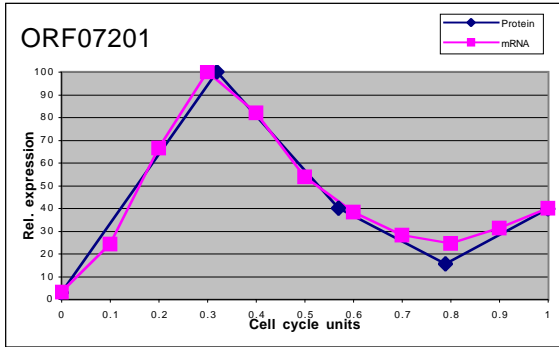

Supplement: pnas_071538098_7.pdf [file pnas_071538098_7.pdf]

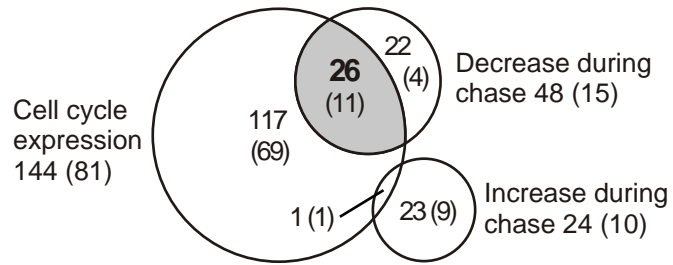

Supplement: pnas_071538098_9.pdf [file pnas_071538098_9.pdf]
